# Supplementary material for: Automatic Classification of GI Organs in Wireless Capsule Endoscopy Using a No-Code Platform-Based Deep Learning Model
Source: MDPI journal article supplement (doi:10.3390/diagnostics13081389), 2023-04-11
Supplement: s1 [file s1]

**Supplementary Table S1. Number of images extracted from 100 CE videos and used for validating GI organ classification AI model after the noise control process**

|                        | Total GI tracts    | Esophagus  | Stomach        | Small bowel        | Colon              |
|------------------------|--------------------|------------|----------------|--------------------|--------------------|
| Extracted images       | 1,715,852          | 5,400      | 229,618        | 1,206,033          | 274,801            |
| (Range of images/case) | (5,597-50,720)     | (0-2,752)  | (0-14,367)     | (1,583-32,617)     | (0-22,040)         |
| Noise images           | 311,525<br>(18.2%) | 60 (11.1%) | 11,644 (5.07%) | 218,420<br>(18.1%) | 81,525<br>(29.67%) |
| (Range of images/case) | (51-35,181)        | (0-23)     | (0-2,378)      | (9-19,195)         | (0-15,142)         |
| Total clear images     | 1,404,203          | 5,340      | 217,974        | 987,613            | 193,276            |
| (Range of images/case) | (5,546-27,437)     | (0-2,729)  | (0-12,631)     | (1,243-24,197)     | (0-12,490)         |

**Supplementary Table S2. Comparisons of performance before and after 99.9% cut-off application by paired T-test**

| <b>t-score</b>        |                    | <b>Accuracy</b>            | <b>Recall</b>              | <b>Specificity</b>         | <b>Precision</b>           | <b>NPV</b>                 | <b>F1 score</b>            |
|-----------------------|--------------------|----------------------------|----------------------------|----------------------------|----------------------------|----------------------------|----------------------------|
| <b>99.9%/baseline</b> | <b>Esophagus</b>   | <b>4.017</b><br>(p<0.001)  | 1.220<br>(p=0.226)         | <b>3.952</b><br>(p<0.001)  | <b>11.851</b><br>(p<0.001) | 0.867<br>(p=0.388)         | <b>12.689</b><br>(p<0.001) |
|                       | <b>Stomach</b>     | <b>2.136</b><br>(p=0.035)  | <b>7.769</b><br>(p<0.001)  | 0.568<br>(p=0.572)         | <b>5.490</b><br>(p<0.001)  | <b>4.935</b><br>(p<0.001)  | <b>6.848</b><br>(p<0.001)  |
|                       | <b>Small bowel</b> | <b>16.712</b><br>(p<0.001) | <b>18.893</b><br>(p<0.001) | <b>4.045</b><br>(p<0.001)  | <b>3.007</b><br>(p=0.003)  | <b>13.516</b><br>(p<0.001) | <b>15.958</b><br>(p<0.001) |
|                       | <b>Colon</b>       | <b>13.495</b><br>(p<0.001) | <b>3.216</b><br>(p=0.002)  | <b>16.248</b><br>(p<0.001) | <b>11.064</b><br>(p<0.001) | <b>3.077</b><br>(p=0.003)  | <b>11.332</b><br>(p<0.001) |
| <b>Total</b>          |                    | <b>12.853</b><br>(p<0.001) | <b>11.309</b><br>(p<0.001) | <b>7.036</b><br>(p<0.001)  | <b>13.008</b><br>(p<0.001) | <b>10.597</b><br>(p<0.001) | <b>14.842</b><br>(p<0.001) |

**Supplementary Table S3. Comparisons of GI organ-specific accuracy between small bowel diseases by independent T-test**

| t-score                | Normal       |           |           |               | Blood         |               |               | Inflamed  |           | Vascular  |
|------------------------|--------------|-----------|-----------|---------------|---------------|---------------|---------------|-----------|-----------|-----------|
|                        | Blood        | Inflamed  | Vascular  | Polypoid      | Inflamed      | Vascular      | Polypoid      | Vascular  | Polypoid  | Polypoid  |
| <b>Baseline</b>        |              |           |           |               |               |               |               |           |           |           |
| <b>Esophagus</b>       | <b>2.470</b> | -0.632    | 0.302     | <b>-2.032</b> | <b>-2.549</b> | <b>-2.409</b> | <b>-2.665</b> | 0.781     | -0.918    | -1.618    |
|                        | (p=0.024)    | (p=0.531) | (p=0.764) | (p=0.049)     | (p=0.02)      | (p=0.026)     | (p=0.016)     | (p=0.441) | (p=0.366) | (p=0.126) |
| <b>Stomach</b>         | 2.630        | 0.505     | 0.124     | <b>-1.041</b> | <b>-2.298</b> | <b>-2.379</b> | <b>-3.193</b> | -0.282    | -1.451    | 1.037     |
|                        | (p=0.015)    | (p=0.616) | (p=0.902) | (p=0.304)     | (p=0.03)      | (p=0.025)     | (p=0.005)     | (p=0.78)  | (p=0.156) | (p=0.309) |
| <b>Small bowel</b>     | 0.418        | 0.322     | -0.179    | -0.715        | -0.046        | -0.517        | -1.011        | -0.401    | -0.821    | -0.471    |
|                        | (p=0.678)    | (p=0.749) | (p=0.859) | (p=0.478)     | (p=0.963)     | (p=0.609)     | (p=0.319)     | (p=0.691) | (p=0.418) | (p=0.641) |
| <b>Colon</b>           | 0.837        | -0.606    | -0.177    | -0.564        | -1.198        | -0.906        | -1.151        | 0.371     | 0.029     | -0.322    |
|                        | (p=0.411)    | (p=0.548) | (p=0.861) | (p=0.576)     | (p=0.242)     | (p=0.374)     | (p=0.26)      | (p=0.714) | (p=0.977) | (p=0.75)  |
| <b>Overall</b>         | <b>2.735</b> | -0.067    | -0.172    | -0.798        | <b>-2.529</b> | <b>-2.603</b> | <b>-3.147</b> | -0.096    | -0.648    | -0.549    |
|                        | (p=0.007)    | (p=0.947) | (p=0.864) | (p=0.426)     | (p=0.013)     | (p=0.010)     | (p=0.002)     | (p=0.923) | (p=0.518) | (0.584)   |
| <b>AI score ≥ 99.9</b> |              |           |           |               |               |               |               |           |           |           |
| <b>Esophagus</b>       | 1.675        | -1.015    | -0.269    | -1.009        | -1.705        | -1.684        | -1.460        | 0.694     | -0.128    | -0.741    |
|                        | (p=0.111)    | (p=0.316) | (p=0.789) | (p=0.319)     | (p=0.105)     | (p=0.109)     | (p=0.154)     | (p=0.493) | (p=0.899) | (p=0.465) |
| <b>Stomach</b>         | 0.278        | -0.784    | -0.664    | -0.800        | -1.357        | -1.178        | -1.545        | -0.038    | -0.778    | -0.887    |
|                        | (p=0.782)    | (p=0.437) | (p=0.511) | (p=0.428)     | (p=0.191)     | (p=0.248)     | (p=0.14)      | (p=0.97)  | (p=0.442) | (p=0.383) |
| <b>Small bowel</b>     | -0.272       | 0.869     | -0.352    | -0.245        | 1.046         | -0.145        | -0.058        | -0.967    | -0.789    | 0.039     |
|                        | (p=0.786)    | (p=0.389) | (p=0.727) | (p=0.808)     | (p=0.302)     | (p=0.886)     | (p=0.954)     | (p=0.341) | (p=0.435) | (p=0.97)  |
| <b>Colon</b>           | 0.861        | -0.695    | -0.695    | -0.315        | -1.213        | -1.019        | -0.918        | -0.077    | 0.219     | 0.244     |
|                        | (p=0.399)    | (p=0.491) | (p=0.492) | (p=0.754)     | (p=0.24)      | (p=0.318)     | (p=0.366)     | (p=0.939) | (p=0.828) | (p=0.809) |
| <b>Overall</b>         | 1.251        | -0.491    | -1.000    | -0.821        | -1.600        | <b>-2.260</b> | -1.899        | -0.738    | -0.455    | 0.176     |
|                        | (p=0.212)    | (p=0.624) | (p=0.319) | (p=0.413)     | (p=0.099)     | (p=0.026)     | (p=0.060)     | (p=0.462) | (p=0.650) | (p=0.860) |
